# Supplementary material
Source: PubMed Central journal article supplement (PMC8983438)

Supplemental Tables and Figures

Supplemental Table 1. Number of complications by treatment

| Treatment Variable             | Number of Complications |     |      |     |     |     |           |     | p value |
|--------------------------------|-------------------------|-----|------|-----|-----|-----|-----------|-----|---------|
|                                | None                    |     | 1    |     | 2   |     | 3 or more |     |         |
|                                | N                       | %   | N    | %   | N   | %   | N         | %   |         |
| <b>Adjuvant therapy</b>        |                         |     |      |     |     |     |           |     | <0.001  |
| Chemotherapy and radiation     | 979                     | 15% | 361  | 14% | 147 | 11% | 130       | 9%  |         |
| Chemotherapy only              | 1645                    | 25% | 741  | 28% | 419 | 33% | 448       | 30% |         |
| Radiation therapy only         | 1510                    | 23% | 509  | 20% | 211 | 16% | 182       | 12% |         |
| Neither                        | 2495                    | 38% | 993  | 38% | 510 | 40% | 741       | 49% |         |
| <b>Adjuvant therapy timing</b> |                         |     |      |     |     |     |           |     | <0.001  |
| Adjuvant received with 12 wks  | 3823                    | 58% | 1480 | 57% | 710 | 55% | 637       | 42% |         |
| Adjuvant delay (>12 wks)       | 311                     | 5%  | 131  | 5%  | 67  | 5%  | 123       | 8%  |         |
| No Treatment                   | 2495                    | 38% | 993  | 38% | 510 | 40% | 741       | 49% |         |

Supplemental Table 2. Adjuvant therapy, surgery type, and complications by diagnosis year group

|                                | 2000-2004 |     | 2005-2009 |     | 2010-2015 |     | p-value |
|--------------------------------|-----------|-----|-----------|-----|-----------|-----|---------|
|                                | N         | %   | N         | %   | N         | %   |         |
| <b>Adjuvant therapy</b>        |           |     |           |     |           |     | <.001   |
| Chemotherapy and radiation     | 296       | 8%  | 454       | 12% | 867       | 19% |         |
| Chemotherapy only              | 639       | 18% | 1002      | 27% | 1612      | 35% |         |
| Radiation therapy only         | 981       | 27% | 777       | 21% | 654       | 14% |         |
| Neither                        | 1731      | 47% | 1499      | 40% | 1509      | 33% |         |
| <b>Surgical Type</b>           |           |     |           |     |           |     | <.001   |
| Open                           | 3,497     | 96% | 3,095     | 83% | 2,218     | 48% |         |
| MIS                            | 150       | 4%  | 637       | 17% | 2,424     | 52% |         |
| <b>Number of Complications</b> |           |     |           |     |           |     | <.001   |
| None                           | 1949      | 53% | 1943      | 52% | 2737      | 59% |         |
| 1                              | 851       | 23% | 849       | 23% | 904       | 19% |         |
| 2                              | 439       | 12% | 420       | 11% | 428       | 9%  |         |
| 3 or more                      | 408       | 11% | 520       | 14% | 573       | 12% |         |

Supplemental Table 3. Route of surgery by stage, complication, and treatment for all cases and stratified by race/ethnicity.

| Race / Ethnicity | Clinical Variable         | Route of Surgery |       |       |       | p-value |
|------------------|---------------------------|------------------|-------|-------|-------|---------|
|                  |                           | Open             |       | MIS   |       |         |
|                  |                           | N                | Row % | N     | Row % |         |
| <b>All Cases</b> | <b>Total</b>              | 8,810            | 73%   | 3,211 | 27%   |         |
|                  | <b>Stage</b>              |                  |       |       |       | <.001   |
|                  | Stage I-II                | 5,839            | 69%   | 2,681 | 31%   |         |
|                  | Stage III-IV              | 2,860            | 85%   | 498   | 15%   |         |
|                  | <b>Complications</b>      |                  |       |       |       | <.001   |
|                  | 0-1                       | 6,354            | 69%   | 2,879 | 31%   |         |
|                  | 2+                        | 2,456            | 88%   | 332   | 12%   |         |
|                  | <b>Adjuvant treatment</b> |                  |       |       |       | <.001   |
|                  | CRT                       | 1,017            | 63%   | 600   | 37%   |         |
|                  | CT                        | 2,355            | 72%   | 898   | 28%   |         |
|                  | RT                        | 1,854            | 77%   | 558   | 23%   |         |
| Neither          | 3,584                     | 76%              | 1,155 | 24%   |       |         |
| <b>NHW</b>       | <b>Total</b>              | 7,153            | 72%   | 2,738 | 28%   |         |
|                  | <b>Stage</b>              |                  |       |       |       | <.001   |
|                  | Stage I-II                | 4,800            | 68%   | 2,305 | 32%   |         |
|                  | Stage III-IV              | 2,267            | 85%   | 403   | 15%   |         |
|                  | <b>Complications</b>      |                  |       |       |       | <.001   |
|                  | 0-1                       | 5,219            | 68%   | 2,465 | 32%   |         |
|                  | 2+                        | 1,934            | 88%   | 273   | 12%   |         |
|                  | <b>Adjuvant treatment</b> |                  |       |       |       | <.001   |
|                  | CRT                       | 811              | 62%   | 500   | 38%   |         |
|                  | CT                        | 1,844            | 71%   | 750   | 29%   |         |
|                  | RT                        | 1,536            | 76%   | 492   | 24%   |         |
| Neither          | 2,962                     | 75%              | 996   | 25%   |       |         |
| <b>NHB</b>       | <b>Total</b>              | 1,186            | 80%   | 288   | 20%   |         |
|                  | <b>Stage</b>              |                  |       |       |       | <.001   |
|                  | Stage I-II                | 737              | 76%   | 233   | 24%   |         |
|                  | Stage III-IV              | 426              | 89%   | 54    | 11%   |         |
|                  | <b>Complications</b>      |                  |       |       |       | <.001   |
|                  | 0-1                       | 816              | 77%   | 246   | 23%   |         |
|                  | 2+                        | 370              | 90%   | 42    | 10%   |         |
|                  | <b>Adjuvant treatment</b> |                  |       |       |       | <.001   |
|                  | CRT                       | 149              | 68%   | 70    | 32%   |         |
|                  | CT                        | 371              | 81%   | 88    | 19%   |         |

|                 |                           |     |     |     |     |       |
|-----------------|---------------------------|-----|-----|-----|-----|-------|
|                 | RT                        | 229 | 86% | 38  | 14% |       |
|                 | Neither                   | 437 | 83% | 92  | 17% |       |
| <b>Hispanic</b> | <b>Total</b>              | 471 | 72% | 185 | 28% |       |
|                 | <b>Stage</b>              |     |     |     |     | 0.001 |
|                 | Stage I-II                | 302 | 68% | 143 | 32% |       |
|                 | Stage III-IV              | 167 | 80% | 41  | 20% |       |
|                 | <b>Complications</b>      |     |     |     |     | <.001 |
|                 | 0-1                       | 319 | 66% | 168 | 34% |       |
|                 | 2+                        | 152 | 90% | 17  | 10% |       |
|                 | <b>Adjuvant treatment</b> |     |     |     |     | 0.335 |
|                 | CRT                       | 57  | 66% | 30  | 34% |       |
|                 | CT                        | 140 | 70% | 60  | 30% |       |
|                 | RT                        | 89  | 76% | 28  | 24% |       |
|                 | Neither                   | 185 | 73% | 67  | 27% |       |

# Supplemental Figure 1. Overall survival by race/ethnicity stratified by adjuvant treatment delay or omission among women who survived at least 3 months from surgery.

**Supplemental Figure 1.** Overall survival by race/ethnicity stratified by adjuvant treatment delay or omission among women who survived at least 3 months from surgery.

1A. Adjuvant treatment received without delay

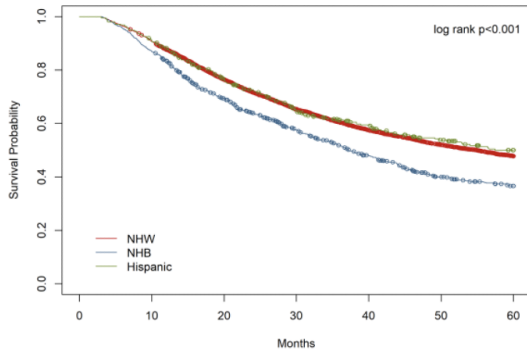

1C. No adjuvant treatment

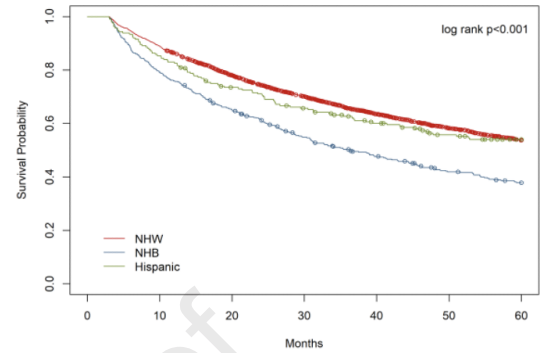

1B. Adjuvant treatment received with delay

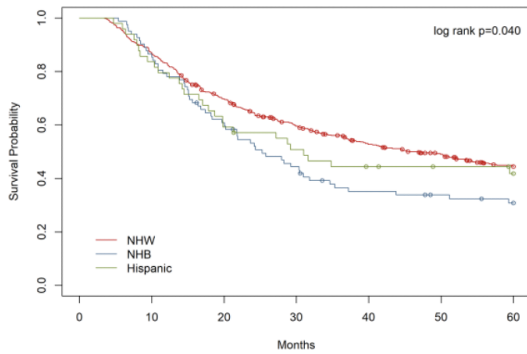

NHW: Non-Hispanic White; NHB: Non-Hispanic Black

Journal Pre-proof

**Supplemental Figure 2. Overall survival by adjuvant treatment delay or omission, stratified by FIGO Stage among women who survived at least 3 months from surgery.**

**2A. FIGO Stage I-II**

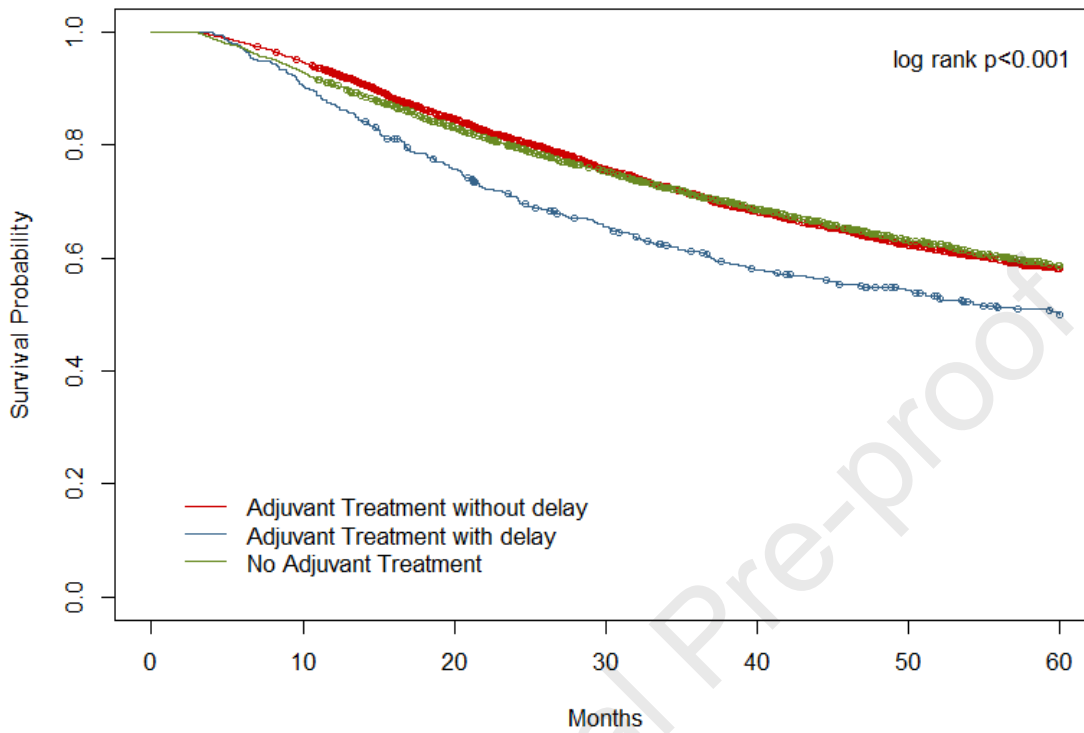

**2B. FIGO Stage III-IV**

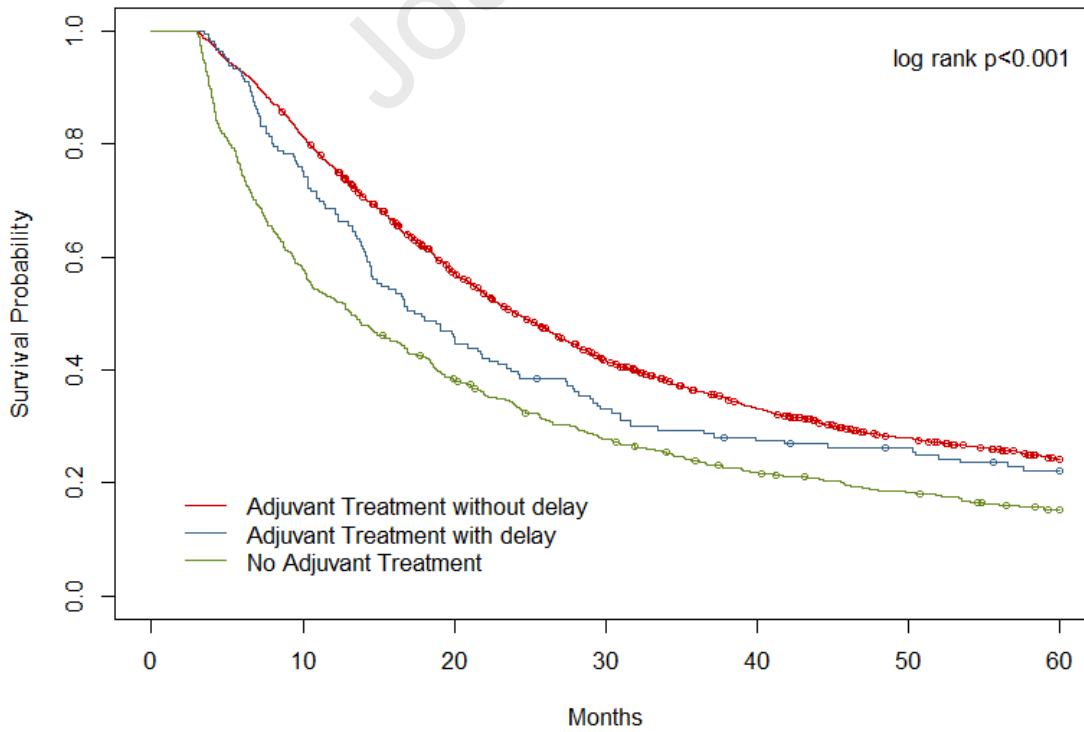

Supplement: NIHMS1753393-supplement-1.pdf [file NIHMS1753393-supplement-1.pdf]
